# Supplementary material
Source: ML conference proceedings conference paper supplement (https://openaccess.thecvf.com/content/CVPR2026/html/Cui_SIMPLEPOSTER_A_SIMPLE_CVPR_2026_paper.html)
Supplement: Supplementary file 1 [file Cui_SIMPLEPOSTER_A_SIMPLE_CVPR_2026_supplemental.pdf]

## Supplementary Material

This document provides: (i) detailed discussion of limitations (Section A); (ii) generalization experiments of Character Position Encoding (CPE) on multilingual text-to-image synthesis (Section B); (iii) qualitative comparison of subject extension mitigation strategies (Section C); (iv) data efficiency analysis investigating minimal data requirements for eliminating subject extension (Section D); (v) automatic evaluation metrics for subject preservation using DinoV3 (Section E); and (vi) complete text prompts for visualized examples in the main paper (Section F).

### A. Limitations

While SimplePoster achieves strong performance in product poster generation, several limitations remain, falling into three main categories:

**Dependency on segmentation and matting quality.** Our framework assumes the input product image has a clean white background. When this is not the case, we rely on off-the-shelf segmentation and matting models to extract the foreground. However, inaccurate extraction—such as over-segmentation (including non-product regions) or under-segmentation (truncating parts of the product)—can degrade generation quality. This issue is particularly pronounced when the original image contains dense promotional text, which may confuse the extractor and lead to incorrect masks. In such cases, the inpainting model must either reconstruct missing product content or suppress conflicting background elements, potentially compromising structural fidelity. As demonstrated in the last row of Figure 3 of the main paper, under-segmentation forces the model to complete missing sections. In contrast, general image editing models do not require explicit foreground masking and can implicitly localize the subject from context, though they risk misidentification as well.

**Inability to modify product attributes under inpainting constraints.** The inpainting paradigm enforces strict preservation of the unmasked product region, preventing changes to intrinsic product states. For example, if the input shows a water-filled bottle but the prompt requests an empty one, SimplePoster cannot fulfill this instruction without modifying the masked area. It is a fundamental constraint of the inpainting framework. While this design ensures high subject fidelity, it limits applicability to tasks requiring semantic edits to the product itself, such as state changes, color swaps, or style transfers within the product region.

**Text generation accuracy can be further improved.** Despite leveraging precise text line coordinate, SimplePoster only slightly outperforms SeedEdit3.0 which relies solely on coarse spatial cues, in overall text rendering quality. As discussed in Section 5.5 of the main paper, we attribute this primarily to differences in base model capabilities. This suggests that while our layout control mechanism is effective, further improvements in text fidelity will depend on stronger pretraining in multilingual data.

### B. Generalization Verification of Character Position Encoding

To validate the generalization capability of our Character Position Encoding (CPE) on general text-to-image synthesis and multilingual scenarios, we conduct a pilot experiment extending FLUX.1-dev—originally an English-only model—to generate Japanese and Korean text.

#### B.1. Dataset

We collect approximately 4w images containing Japanese or Korean text from social media platforms, evenly split between the two languages. Unlike product posters, these images feature relatively simple layouts, predominantly single-line text. We construct two validation sets: (i) *Single-line*: images containing one text line; (ii) *Multi-line*: images containing two or more text lines.

#### B.2. Implementation.

We first replace the T5 text encoder in FLUX.1-dev with Qwen2.5-VL, following the main paper. We establish a baseline by fine-tuning the DiT with LoRA (rank=256) for 30 epochs. Subsequently, we incorporate our Character Position Encoding during training, applying it with 50% probability per image. During inference, we disable CPE, reverting the model to standard text-to-image generation.

#### B.3. Results

As shown in Table 1, CPE yields substantial improvements on the multi-line validation set and moderate gains on the single-line set. Notably, multi-line text accuracy (Sen. Acc) improves by 458% relative to the baseline (25.7% vs. 4.6%), demonstrating that CPE is particularly critical for complex layouts where spatial ambiguity is most severe.

| Method         | Single-line    |                     | Multi-line     |                     |
|----------------|----------------|---------------------|----------------|---------------------|
|                | NED $\uparrow$ | Sen. Acc $\uparrow$ | NED $\uparrow$ | Sen. Acc $\uparrow$ |
| LoRA (w/o CPE) | 0.6326         | 0.3899              | 0.1924         | 0.0461              |
| LoRA (w/ CPE)  | <b>0.6765</b>  | <b>0.4698</b>       | <b>0.4813</b>  | <b>0.2571</b>       |

Table 1. Experiments on multilingual text-to-image generation.

### C. Qualitative Comparison of Subject Extension Mitigation

Figure 1 compares generation results across four configurations: (1) vanilla FLUX-Fill baseline, (2) ControlNet-augmented, (3) LoRA-tuned, and (4) our full-parameter fine-tuning approach.

### D. Ablation on Data Scale

We conduct an ablation study to investigate how much data is required to eliminate subject extension. Following the protocol in Section 3 of the main paper, we fix the total training iterations while varying dataset size: 3K images for 300 epochs, 30K images for 30 epochs, and 300K images for 3 epochs.

As shown in Table 2, surprisingly, even 3K training images reduce the extension rate from 41% to 3.6%, outperforming ControlNet trained on 300K images (23.6%). We further reduce training epochs for the 3K subset to 3 and 10 epochs; performance drops to 17.3% and 9.3%, respectively, indicating that sufficient iterations are necessary for convergence.

| Method                   | Subject Extension Rate $\downarrow$ |
|--------------------------|-------------------------------------|
| Vanilla FLUX-Fill        | 41.0%                               |
| ControlNet               | 23.6%                               |
| Full tuning (3K, 3 ep)   | 17.3%                               |
| Full tuning (3K, 10 ep)  | 9.3%                                |
| Full tuning (3K, 300 ep) | 3.6%                                |
| Full tuning (30K, 30 ep) | 2.0%                                |
| Full tuning (300K, 3 ep) | 0.6%                                |

Table 2. Subject extension rate under varying data scales.

### E. Automatic evaluation on subject preservation

Since the extension rate relies on human evaluation, we additionally provide an automatic evaluation method here. Specifically, we crop the subject regions, extract embedding using DINO v3 [1], and compute the cosine similarity between the original product and the generated product to automatically measure subject fidelity. We report DINOv3 [1]. similarity on the segmented subject to quantify consistency Table 3. Model-based metrics are less reliable than human evaluation as they may miss fine-grained errors (e.g., subtle text artifacts, minor texture distortions). We recommend treating these as supplementary indicators only.

| Method            | DINOv3 similarity $\uparrow$ |
|-------------------|------------------------------|
| FLUX Kontext(pro) | 0.9123                       |
| Step1x-Edit       | 0.9050                       |
| Gemini2.5Flash    | 0.9366                       |
| SeedEdit3         | 0.9465                       |
| PosterMaker       | 0.9706                       |
| Ours              | <b>0.9811</b>                |

Table 3. Subject similarity in DINOv3.

## F. Complete Prompts for Visualized Examples

All text prompts corresponding to visualized examples in the main paper are provided below. Original Chinese prompts are translated to English. For general editing models (SeedEdit 3/DreamPoster, Gemini 2.5 Flash, FLUX-Kontext, Step1x-Edit), we prepend the standardized prefix ``Background generation task.`` to all prompts.

**Examples without promotional text.** See Figure 3.

**Examples with promotional text.** See Figure 2.

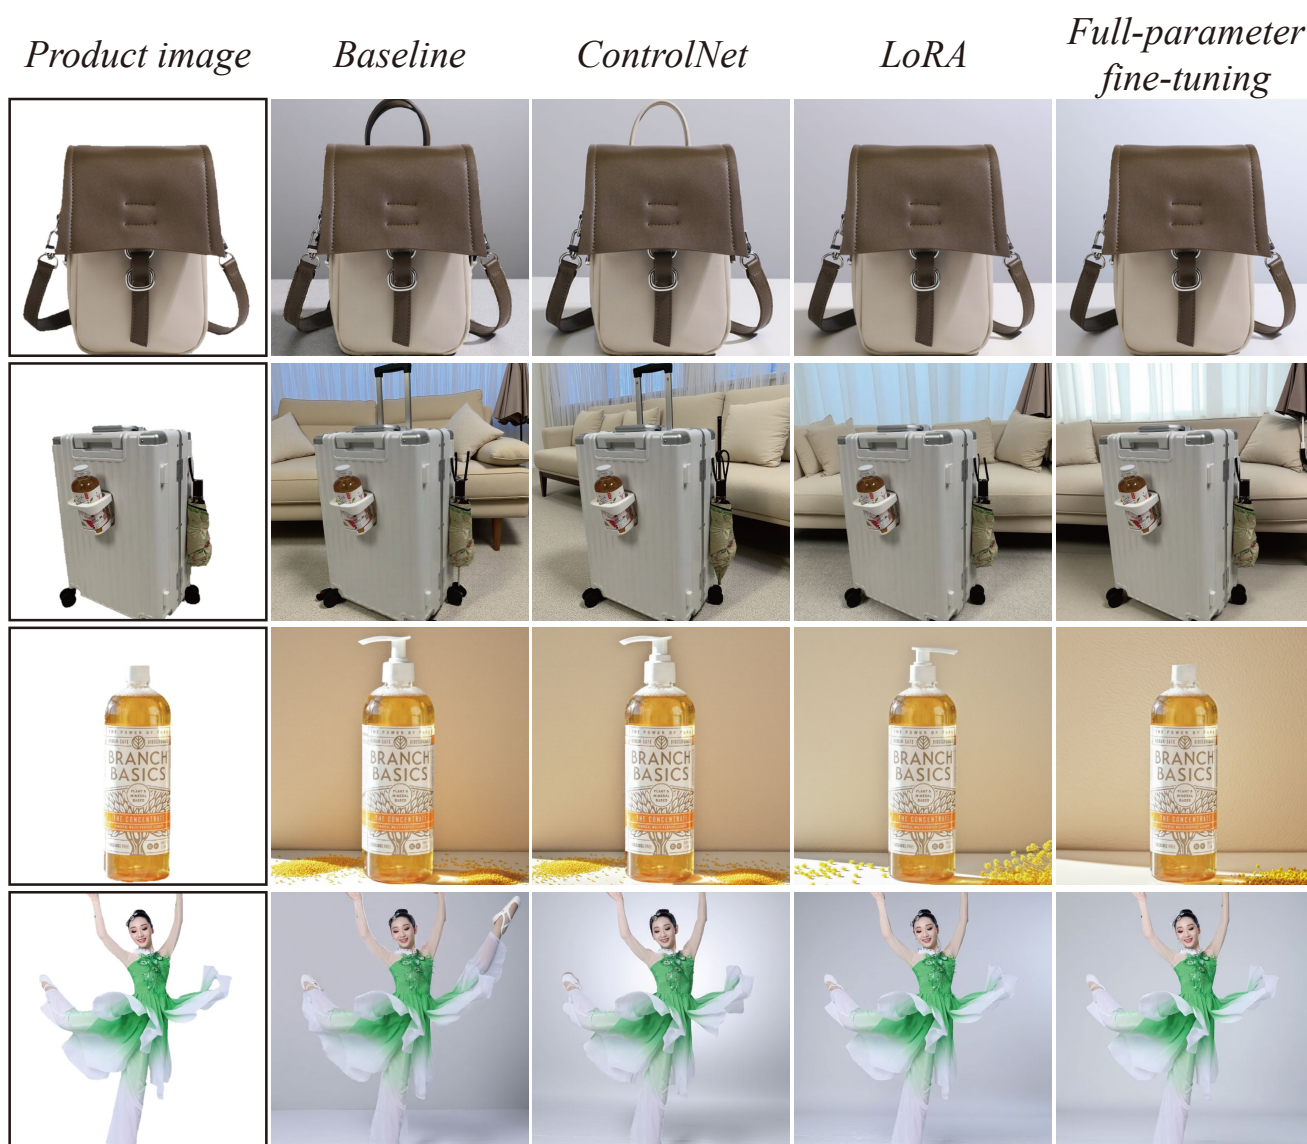

Figure 1. Samples with promotional text.

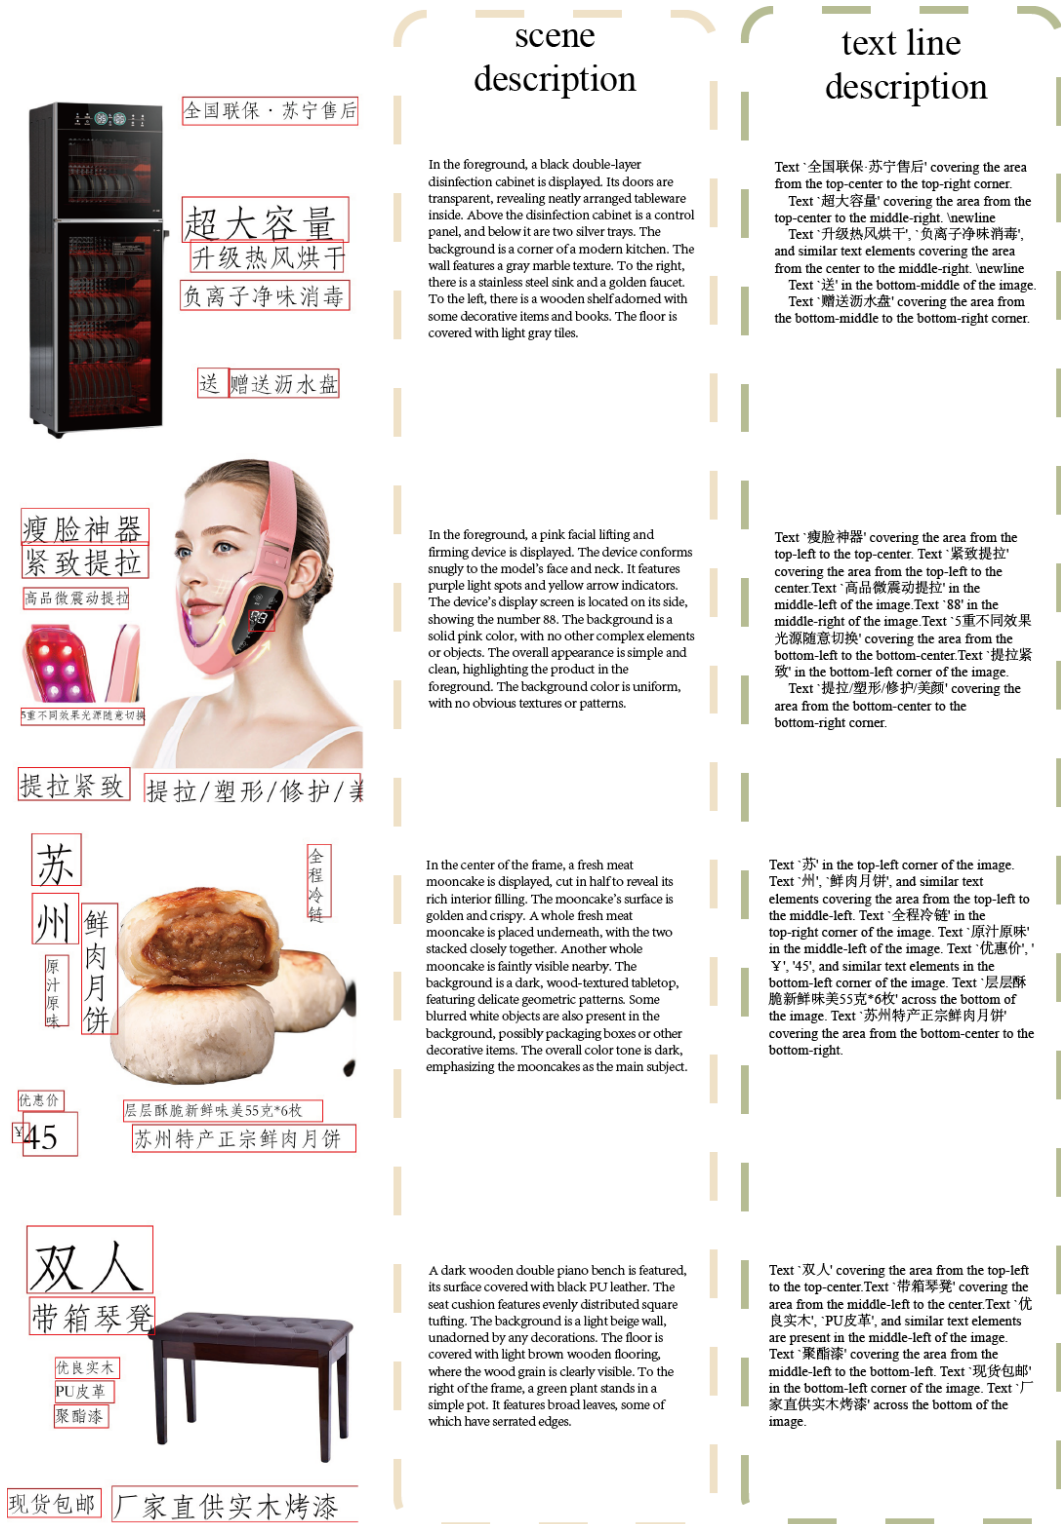

Figure 2. Samples with promotional text.

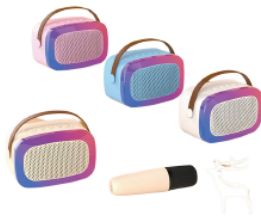

In the foreground, four small portable Bluetooth speakers with gradient colors are displayed, each placed on a wooden step. Each speaker is equipped with a brown carrying strap, and their colors graduate from pink to purple, showcasing a stylish and compact design. The background features a yellow curtain, soft in texture with natural, even folds. To the right, there is a light orange geometric decorative object, resembling an arch, which adds depth to the space. The wooden steps are dark brown with clear, smooth grain, creating a strong contrast with the speakers. The ground is light pink, clean and tidy. In the bottom-right corner, there is a small white deer figurine and a black microphone model, adding a playful touch. There is no obvious text information in the image.

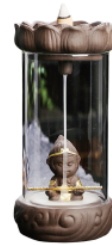

A creative backflow incense burner, with a lotus-shaped body, features an inverted incense stick placed on top, from which ash slowly flows downwards. At its base is a statue of a small monk meditating with closed eyes. The entire setup is displayed inside a transparent glass dome. The background is a dark wooden bookshelf, neatly arranged with books and decorative items, creating a serene and elegant atmosphere. To the left, there is a green plant, adding a touch of vitality. The incense burner is placed on a gray stone countertop with clear, natural textures. Beside it, a string of wooden prayer beads further enhances the Zen ambiance.

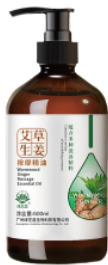

A bottle of essential oil is placed on a natural stone slab with irregular edges and a rough texture. To the left, a sprig of rosemary leans against a large, beige, porous rock. The background is a smooth, warm beige gradient. Soft light, high resolution.

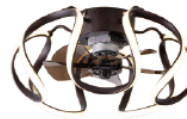

A modern-style lamp hangs from a white ceiling, composed of multiple circular structures. The lamp body is black, and the light strip emits a soft white glow. The background is an indoor environment with a smooth, flat ceiling. On the left side of the wall, there is a dark wooden decorative panel with clear grain. On the right side, a light gray translucent curtain allows soft light to filter through. Inside the room, there is also a dark brown door with simple line decorations. The overall environment is warm and modern.

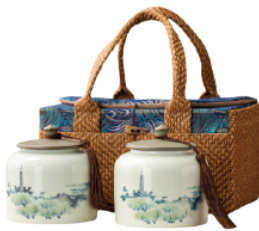

There are two celadon tea canisters in the foreground, decorated with landscape paintings on their surfaces and adorned with brown tassels. They are neatly placed on a wooden tabletop. The background features a light gray wall, on which hangs a piece of calligraphy framed in wood, echoing the color of the tabletop. In front of the wall on the left side, there is a potted green plant with slender leaves, adding a touch of vitality. On the right side, there is a woven basket decorated with blue patterned fabric. The overall color palette is harmonious and unified, creating a tranquil and elegant atmosphere. There is no obvious text visible in the image.

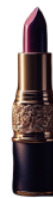

A purple lipstick with a gold and black alternating casing, adorned with delicate patterns, is standing upright on a tabletop. The background is dark and blurred, creating a mysterious and elegant atmosphere. In the background, there are a few pale pink flowers with delicate petals and deep purple stamens. Some petals and small berries are scattered around the flowers, giving an overall impression of nature intertwined with luxury.

Figure 3. Samples without promotional text.

## References

- [1] Oriane Siméoni, Huy V. Vo, Maximilian Seitzer, Federico Baldassarre, Maxime Oquab, Cijo Jose, Vasil Khalidov, Marc Szafraniec, Seungeun Yi, Michaël Ramamonjisoa, Francisco Massa, Daniel Haziza, Luca Wehrstedt, Jianyuan Wang, Timothée Darcet, Théo Moutakanni, Leonel Sentana, Claire Roberts, Andrea Vedaldi, Jamie Tolan, John Brandt, Camille Couprie, Julien Mairal, Hervé Jégou, Patrick Labatut, and Piotr Bojanowski. Dinov3, 2025. [2](#)
